# Supplementary material for: Media matters: culture medium-dependent hypervariable phenotype of mesenchymal stromal cells
Source: PubMed Central journal article supplement (PMC10717324; doi:10.1186/s13287-023-03589-w), 2023-12-12
Supplement: 13287_2023_3589_MOESM1_ESM.pdf [file 13287_2023_3589_MOESM1_ESM.pdf]

**Supplementary Information 1:**  
**Antibody details for flow cytometric characterisation of BM-MSC surface immunophenotype.**

| <b>Antigen</b> | <b>Supplier</b> | <b>Catalogue Number</b> | <b>Dilution</b> |
|----------------|-----------------|-------------------------|-----------------|
| CD105          | Invitrogen      | MHCD10504               | 1:50            |
| CD73           | BD              | 550257                  | 1:25            |
| CD90           | BD              | 555596                  | 1:500           |
| CD14           | AbD Serotec     | SFL2185                 | 1:50            |
| CD19           | BD              | 345777                  | 1:25            |
| CD3            | BD              | 345765                  | 1:25            |
| CD34           | BD              | 555822                  | 1:25            |
| CD45           | BD              | 555483                  | 1:25            |
| HLA-DR         | Invitrogen      | MHLDR04                 | 1:25            |
| IgG1k isotype  | BD              | 554680                  |                 |
| IgG2b isotype  | Invitrogen      | MG2B04                  |                 |
