# Supplementary material for: Media matters: culture medium-dependent hypervariable phenotype of mesenchymal stromal cells
Source: PubMed Central journal article supplement (PMC10717324; doi:10.1186/s13287-023-03589-w), 2023-12-12
Supplement: 13287_2023_3589_MOESM2_ESM.pdf [file 13287_2023_3589_MOESM2_ESM.pdf]

**Supplementary Information 2:**  
**Surface marker expression data (percentage of positive expression) for each individual marker, culture condition and donor (D191, D197 and D199 respectively), as assessed by BD Lyoplate™ Human Cell Surface Marker Screening Panel.**

| Marker | PS2  |      |      | PL   |      |      | Selected FBS |      |      | Selected FBS +FGF2 |      |      | Unselected FBS +FGF2 |      |      |
|--------|------|------|------|------|------|------|--------------|------|------|--------------------|------|------|----------------------|------|------|
|        | D191 | D197 | D199 | D191 | D197 | D199 | D191         | D197 | D199 | D191               | D197 | D199 | D191                 | D197 | D199 |
| CD1a   | 1.63 | 0.5  | 0.4  | 6.28 | 2.7  | 0.6  | 0.07         | 0.3  | 1.4  | 1.4                | 0.7  | 1.6  | 0.09                 | 15.4 | 1.3  |
| CD1b   | 51.8 | 0.6  | 0.7  | 10.5 | 3.1  | 1    | 0.36         | 0.6  | 1.3  | 0.23               | 0.8  | 1.7  | 0.16                 | 0.12 | 1.5  |
| CD1d   | 0.57 | 0.5  | 0.3  | 0.39 | 2.3  | 0.8  | 0.12         | 0.3  | 1.4  | 0.21               | 0.6  | 1.4  | 0.09                 | 0.22 | 1.4  |
| CD2    | 0    | 0.2  | 0.3  | 0.31 | 2.1  | 0.7  | 0.07         | 0.3  | 1    | 0.26               | 0.7  | 1.1  | 0.14                 | 0.24 | 0.8  |
| CD3    | 0.17 | 0.5  | 0.5  | 0.41 | 2.6  | 0.9  | 0.1          | 0.4  | 1    | 0.4                | 0.4  | 1.3  | 0.16                 | 0.22 | 1.4  |
| CD4    | 0.9  | 1    | 1.3  | 1    | 3.6  | 5.1  | 73.6         | 9.5  | 11.4 | 6.38               | 12.1 | 14.9 | 3.2                  | 9.19 | 12   |
| CD4v4  | 0.8  | 1    | 1.9  | 0.81 | 2.3  | 3    | 2.1          | 6.8  | 6.2  | 3.89               | 7.1  | 8.9  | 1.94                 | 4.68 | 6.6  |
| CD5    | 0.17 | 0.7  | 0.1  | 0.44 | 1.4  | 1    | 0.16         | 0.5  | 1.1  | 0.24               | 0.5  | 1.1  | 0.29                 | 0.28 | 1.3  |
| CD6    | 0.1  | 0.3  | 0.6  | 0.44 | 1.8  | 0.7  | 0.017        | 0.5  | 1    | 0.14               | 0.4  | 1.1  | 0.19                 | 0.18 | 0.8  |
| CD7    | 0.07 | 1.9  | 1    | 0.37 | 1.3  | 0.9  | 0.14         | 0.4  | 1.1  | 0.25               | 0.8  | 1.2  | 0.17                 | 0    | 0.7  |
| CD8a   | 0.2  | 0.3  | 0.4  | 0.38 | 1    | 0.7  | 0.1          | 0.2  | 1.1  | 0.26               | 0.3  | 1.3  | 0.14                 | 0.32 | 0.9  |
| CD8b   | 0.14 | 0.7  | 0.6  | 0.5  | 2.6  | 1.1  | 0.19         | 0.6  | 1.3  | 0.19               | 0.6  | 1.6  | 0.24                 | 0.4  | 1.2  |
| CD9    | 92.1 | 96.8 | 95.9 | 90   | 98.4 | 96.8 | 73.5         | 72.9 | 81.2 | 92.7               | 88.4 | 91.8 | 85.6                 | 78.9 | 90.7 |
| CD10   | 99.8 | 99.6 | 99.4 | 75.5 | 96.3 | 91.8 | 0.7          | 15.7 | 12   | 9.34               | 30.6 | 31.9 | 9.05                 | 9    | 23.3 |
| CD11a  | 1.22 | 0.4  | 0.2  | 0.31 | 1.7  | 0.9  | 0.14         | 0.2  | 1    | 0.16               | 0.5  | 1.2  | 0.07                 | 0.28 | 1    |
| CD11b  | 0.43 | 0.3  | 0.6  | 0.26 | 1.5  | 1.2  | 0.17         | 0.3  | 0.9  | 0.22               | 0.8  | 1.3  | 0.17                 | 0.3  | 1.4  |
| CD11c  | 0.03 | 0.3  | 0.1  | 0.37 | 1.9  | 0.8  | 0.1          | 0.5  | 0.9  | 0.29               | 0.3  | 0.8  | 0.17                 | 0.22 | 1    |
| CD13   | 98.3 | 99.9 | 100  | 98.8 | 100  | 99.9 | 97.7         | 99.9 | 99.9 | 99.3               | 99.9 | 99.8 | 96.6                 | 99.5 | 99.9 |
| CD14   | 0.83 | 2    | 0.4  | 1.39 | 1.1  | 1    | 2.24         | 0.4  | 1.1  | 1.17               | 0.4  | 1.2  | 2.83                 | 0.3  | 2.4  |
| CD15   | 96   | 83.1 | 79.4 | 0.42 | 1.5  | 0.9  | 3.86         | 0.5  | 1    | 0.26               | 0.6  | 0.8  | 0.18                 | 0.28 | 1    |
| CD15s  | 0.23 | 0.2  | 0.6  | 0.4  | 0.7  | 0.8  | 0.1          | 0.4  | 0.5  | 0.28               | 0.4  | 1    | 0.15                 | 0.26 | 1.2  |
| CD16   | 0.16 | 0.3  | 1.7  | 0.24 | 1.1  | 0.6  | 11.8         | 0.2  | 0.6  | 0.22               | 0.3  | 1    | 0.1                  | 0.12 | 0.9  |
| CD18   | 0.33 | 8    | 22   | 1.93 | 7.5  | 9.7  | 0.48         | 10   | 5.3  | 2.54               | 7    | 6.7  | 0.19                 | 0.32 | 3.3  |

| Marker | PS2  |      |      | PL   |      |      | Selected FBS |      |      | Selected FBS +FGF2 |      |      | Unselected FBS +FGF2 |      |      |
|--------|------|------|------|------|------|------|--------------|------|------|--------------------|------|------|----------------------|------|------|
|        | D191 | D197 | D199 | D191 | D197 | D199 | D191         | D197 | D199 | D191               | D197 | D199 | D191                 | D197 | D199 |
| CD19   | 0.07 | 0.2  | 0.3  | 34.3 | 1.4  | 0.9  | 0.03         | 0.5  | 0.9  | 0.26               | 0.7  | 1.1  | 0.14                 | 0.26 | 1.2  |
| CD20   | 0.13 | 0.5  | 0.9  | 0.46 | 1.4  | 0.9  | 0.28         | 0.5  | 1.6  | 1.1                | 0.7  | 1.1  | 0.09                 | 0.2  | 1.9  |
| CD21   | 0.23 | 0.1  | 0.6  | 0.28 | 1.2  | 0.9  | 0.05         | 0.3  | 1.4  | 0.2                | 4.2  | 0.8  | 0.1                  | 0.37 | 1.1  |
| CD22   | 0.2  | 0.3  | 0.4  | 0.37 | 1.1  | 0.9  | 0.03         | 0.4  | 1.2  | 0.14               | 0.8  | 1.1  | 0.05                 | 0.28 | 1    |
| CD23   | 0.07 | 0.2  | 0.3  | 0.35 | 1.3  | 0.8  | 0.12         | 0.3  | 1    | 0.17               | 0.5  | 1    | 0.05                 | 0.26 | 1    |
| CD24   | 0.17 | 0.4  | 1.2  | 50.3 | 18.7 | 8.2  | 2.26         | 1    | 6.1  | 0.31               | 0.6  | 1.2  | 0.27                 | 0.16 | 1.6  |
| CD25   | 0.07 | 0.2  | 0.4  | 4.48 | 1.1  | 0.7  | 4.44         | 0.4  | 1.2  | 0.19               | 0.4  | 1.3  | 2.42                 | 0.16 | 1.1  |
| CD26   | 1.16 | 6.2  | 1.6  | 38.2 | 50.3 | 63   | 5.06         | 14.4 | 42.6 | 73.3               | 70.9 | 76.1 | 62.3                 | 37.1 | 65.3 |
| CD27   | 0.17 | 0.5  | 0.6  | 0.16 | 1.6  | 0.9  | 6.31         | 0.3  | 1.3  | 0.17               | 0.5  | 0.8  | 1.98                 | 0.12 | 1.1  |
| CD28   | 0.1  | 0.2  | 0.4  | 0.14 | 1    | 0.7  | 0.27         | 0.5  | 1.1  | 0.21               | 0.4  | 1    | 0.18                 | 0.26 | 1    |
| CD29   | 99.8 | 100  | 100  | 98.3 | 99.9 | 99.9 | 95.6         | 100  | 100  | 98.8               | 100  | 99.9 | 96.5                 | 99.5 | 99.9 |
| CD30   | 0.43 | 0.5  | 0.7  | 1.7  | 1.7  | 1.3  | 1.6          | 0.8  | 0.7  | 1.64               | 0.9  | 1.8  | 2.12                 | 0.26 | 0.9  |
| CD31   | 6.28 | 6.9  | 8.7  | 0.41 | 4    | 1.1  | 0.15         | 2.5  | 3.3  | 15.8               | 24.8 | 7.8  | 11.4                 | 12.9 | 7.5  |
| CD32   | 0.13 | 0.3  | 0.4  | 0.29 | 1.7  | 0.9  | 0.07         | 0.6  | 1.4  | 0.7                | 0.9  | 1.2  | 0.1                  | 0.2  | 1    |
| CD33   | 0.03 | 0.2  | 0.4  | 0.23 | 1.8  | 0.9  | 0.02         | 0.5  | 1.2  | 8.91               | 1.4  | 1    | 0.08                 | 0.2  | 1.4  |
| CD34   | 1.59 | 3    | 2.3  | 0.45 | 1.4  | 0.8  | 0.03         | 0.6  | 1.6  | 0.28               | 0.9  | 1.6  | 0.2                  | 0.47 | 1.7  |
| CD35   | 0.2  | 0.3  | 0.3  | 0.32 | 1.5  | 0.6  | 0.02         | 0.3  | 1.2  | 0.17               | 0.5  | 1    | 0.1                  | 0.31 | 0.9  |
| CD36   | 0.13 | 0.5  | 0.4  | 0.34 | 1.4  | 1.2  | 0.28         | 0.7  | 1.2  | 0.31               | 0.6  | 0.9  | 0.39                 | 0.2  | 1.6  |
| CD37   | 0.3  | 0.5  | 0.3  | 0.27 | 1.5  | 0.7  | 0.02         | 0.4  | 1    | 0.12               | 0.6  | 0.9  | 0.1                  | 0.2  | 1.1  |
| CD38   | 0.1  | 0.3  | 12.9 | 0.32 | 1.1  | 0.8  | 0.24         | 6.2  | 4.4  | 0.57               | 4.6  | 4    | 0.27                 | 1.46 | 2    |
| CD39   | 0.17 | 0.5  | 0.8  | 0.47 | 0.9  | 1.2  | 14.9         | 47.7 | 17.9 | 2.04               | 21.8 | 4.1  | 4.84                 | 23.1 | 3.2  |
| CD40   | 33.6 | 38.6 | 57.9 | 0.48 | 3.3  | 13.8 | 2.25         | 18.1 | 45.8 | 3.17               | 17.5 | 37.3 | 3.8                  | 8.54 | 32.7 |
| CD41a  | 0.1  | 0.4  | 0.4  | 0.48 | 1.2  | 2.9  | 0.13         | 0.6  | 0.9  | 0.22               | 0.4  | 1    | 0.16                 | 0.2  | 0.8  |
| CD41b  | 2.05 | 0.2  | 0.5  | 0.29 | 1.3  | 1.3  | 0.17         | 0.5  | 1.3  | 0.19               | 0.7  | 1.3  | 0.1                  | 0.06 | 0.9  |
| CD42a  | 0.1  | 0.9  | 1.2  | 1.89 | 2.4  | 2.2  | 2.09         | 1.4  | 1.9  | 0.31               | 1.6  | 2.9  | 0.62                 | 0.9  | 3.3  |
| CD42b  | 0.1  | 0.4  | 0.5  | 0.3  | 2    | 0.7  | 0.14         | 0.5  | 1.4  | 1.1                | 0.8  | 1.2  | 0.08                 | 0.28 | 0.9  |

| Marker     | PS2  |      |      | PL   |      |      | Selected FBS |      |      | Selected FBS +FGF2 |      |      | Unselected FBS +FGF2 |      |      |
|------------|------|------|------|------|------|------|--------------|------|------|--------------------|------|------|----------------------|------|------|
|            | D191 | D197 | D199 | D191 | D197 | D199 | D191         | D197 | D199 | D191               | D197 | D199 | D191                 | D197 | D199 |
| CD43       | 0.43 | 0.8  | 1.2  | 0.39 | 3.3  | 1.9  | 0.09         | 1.2  | 1.7  | 0.17               | 0.9  | 1.2  | 0.15                 | 0.26 | 1    |
| CD44       | 98.4 | 99.9 | 100  | 99.2 | 100  | 99.8 | 98.1         | 99.6 | 99.6 | 98.9               | 98.5 | 99.5 | 100                  | 94.6 | 99.2 |
| CD45       | 0.99 | 0.4  | 0.7  | 1.31 | 1.5  | 1.3  | 0.07         | 0.5  | 1.1  | 0.27               | 0.6  | 1.2  | 0.44                 | 0.32 | 1    |
| CD45RA     | 0.03 | 0.5  | 0.7  | 0.41 | 1.1  | 0.9  | 0.31         | 0.5  | 1.1  | 0.27               | 0.8  | 1.2  | 0.05                 | 0.22 | 1.7  |
| CD45RB     | 0.3  | 0.7  | 0.4  | 0.25 | 1.3  | 0.8  | 0.07         | 0.5  | 0.9  | 0.24               | 0.5  | 1.1  | 0.08                 | 0.22 | 1    |
| CD45RO     | 0.23 | 0.5  | 0.9  | 1.1  | 1.2  | 1.3  | 0.87         | 0.4  | 1.2  | 0.19               | 0.7  | 1.3  | 0.27                 | 0.37 | 1.3  |
| CD46       | 97.9 | 100  | 99.9 | 98.5 | 100  | 100  | 97.9         | 100  | 100  | 100                | 100  | 100  | 99.1                 | 99.7 | 99.9 |
| CD47       | 99.9 | 100  | 100  | 99.9 | 100  | 100  | 99.9         | 100  | 100  | 99.9               | 99.9 | 100  | 99.9                 | 99.6 | 100  |
| CD48       | 1.25 | 0.4  | 0.4  | 0.43 | 1.6  | 0.8  | 1.63         | 0.5  | 1.3  | 1.74               | 0.5  | 1.1  | 1.56                 | 0.26 | 1    |
| CD49a      | 27.4 | 82   | 59.3 | 66.5 | 87.1 | 84.1 | 71.8         | 99.4 | 94.9 | 71.5               | 99.5 | 96.6 | 77.2                 | 97.4 | 95.7 |
| CD49b      | 98.7 | 99.3 | 99.7 | 69   | 98.9 | 97.7 | 37.9         | 57   | 89.6 | 99.9               | 99.1 | 99.8 | 98                   | 96.3 | 99.7 |
| CD49c      | 99.9 | 99.9 | 100  | 99.4 | 100  | 100  | 98.3         | 99.9 | 99.9 | 99.9               | 99.9 | 100  | 98.4                 | 99.7 | 99.9 |
| CD49d      | 77.9 | 76   | 58   | 34   | 94.6 | 84.5 | 68.5         | 98.5 | 94.5 | 97                 | 99.5 | 99.2 | 89.2                 | 98.6 | 97.5 |
| CD49e      | 99.8 | 99.9 | 100  | 99.1 | 99.9 | 100  | 99.2         | 99.8 | 99.9 | 99.9               | 99.9 | 99.9 | 99.6                 | 99.6 | 99.8 |
| CD50       | 2.45 | 0.8  | 0.6  | 1.03 | 2.3  | 1.3  | 0.31         | 4.5  | 2.8  | 19.3               | 2.4  | 2.7  | 2.57                 | 0.47 | 2    |
| CD51/ CD61 | 97   | 100  | 99.9 | 98.2 | 99.9 | 99.9 | 67           | 99.9 | 96.4 | 97.8               | 99.7 | 97.6 | 64.2                 | 97.6 | 92.8 |
| CD53       | 0.13 | 0.3  | 0.6  | 1.05 | 0.8  | 0.6  | 1.63         | 0.4  | 1.2  | 1.28               | 0.6  | 0.9  | 1.04                 | 0.24 | 1    |
| CD54       | 11.2 | 39   | 30.1 | 66.6 | 77.6 | 74   | 51.2         | 91.1 | 90.7 | 41.7               | 73.8 | 81.1 | 45.7                 | 62.6 | 81.9 |
| CD55       | 94.9 | 99.4 | 96.7 | 87.4 | 98.7 | 94.3 | 68.4         | 85   | 85.4 | 78.2               | 88.8 | 83   | 68.7                 | 80.6 | 77.8 |
| CD56       | 9.75 | 54   | 32   | 12.2 | 67.3 | 37.6 | 6.78         | 26.7 | 21.4 | 6.83               | 8.5  | 13.2 | 5.21                 | 5.39 | 8.8  |
| CD57       | 85.6 | 66   | 40.6 | 12.4 | 38.1 | 9    | 16.3         | 25.8 | 14.5 | 53.6               | 24.9 | 6.1  | 32.2                 | 10.7 | 15   |
| CD58       | 99.5 | 100  | 100  | 99.4 | 100  | 100  | 98.7         | 100  | 100  | 99.1               | 100  | 100  | 98.8                 | 99.6 | 100  |
| CD59       | 99.9 | 99.8 | 100  | 99.9 | 99.9 | 99.8 | 100          | 99.7 | 99.9 | 100                | 99.9 | 99.9 | 100                  | 99.8 | 99.8 |
| CD61       | 99.7 | 100  | 99.8 | 99.6 | 100  | 99.8 | 56.9         | 99.9 | 93.6 | 99.5               | 99.6 | 96.2 | 66.9                 | 95.9 | 90.7 |
| CD62E      | 2.74 | 0.4  | 0.3  | 0.48 | 1.8  | 0.8  | 0.91         | 0.4  | 1    | 0.16               | 0.5  | 1.3  | 0.12                 | 0.22 | 1.2  |
| CD62L      | 0.23 | 0.3  | 0.6  | 0.45 | 1.6  | 0.7  | 0.05         | 0.5  | 1.1  | 0.36               | 0.7  | 1.2  | 0.13                 | 0.25 | 1.1  |

| Marker         | PS2  |      |      | PL   |      |      | Selected FBS |      |      | Selected FBS +FGF2 |      |      | Unselected FBS +FGF2 |      |      |
|----------------|------|------|------|------|------|------|--------------|------|------|--------------------|------|------|----------------------|------|------|
|                | D191 | D197 | D199 | D191 | D197 | D199 | D191         | D197 | D199 | D191               | D197 | D199 | D191                 | D197 | D199 |
| CD62P          | 0.1  | 0.4  | 0.4  | 0.25 | 1.6  | 0.9  | 0.13         | 0.5  | 1.4  | 0.17               | 0.9  | 1.1  | 0.1                  | 0.14 | 0.9  |
| CD63           | 98.5 | 99.9 | 100  | 98.1 | 100  | 99.9 | 98.9         | 99.8 | 99.8 | 97.3               | 99.9 | 99.9 | 96.6                 | 99.7 | 99.8 |
| CD64           | 2.02 | 0.4  | 0.3  | 1.4  | 1    | 0.7  | 0.38         | 0.2  | 1.3  | 2.6                | 0.5  | 1.3  | 1.89                 | 0.22 | 1    |
| CD66 (a,c,d,e) | 0.43 | 3.1  | 1.3  | 0.34 | 0.9  | 0.8  | 0.05         | 0.8  | 1.3  | 0.45               | 0.8  | 2    | 0.38                 | 0.35 | 1.6  |
| CD66b          | 0.53 | 0.3  | 0.4  | 0.3  | 1.4  | 0.9  | 2.76         | 0.5  | 1.4  | 0.14               | 0.6  | 0.9  | 0.13                 | 0.41 | 1.4  |
| CD66f          | 0.07 | 0.3  | 2.8  | 0.29 | 0.8  | 0.7  | 0.05         | 0.4  | 1.5  | 0.24               | 0.5  | 0.9  | 0.02                 | 0.34 | 1.1  |
| CD69           | 0    | 0.3  | 0.3  | 0.25 | 1.3  | 0.6  | 0.07         | 0.5  | 1    | 0.22               | 0.6  | 1    | 0.15                 | 0.24 | 1.2  |
| CD70           | 18.4 | 0.4  | 0.4  | 0.81 | 1.1  | 1.5  | 0.17         | 0.6  | 2.1  | 0.21               | 0.5  | 1.3  | 0.07                 | 0.16 | 0.9  |
| CD71           | 98   | 99.8 | 99.4 | 93   | 100  | 98.5 | 81.4         | 99.6 | 99.5 | 97.6               | 100  | 99.7 | 93                   | 97   | 99.8 |
| CD72           | 1.69 | 0.9  | 1    | 0.25 | 2.1  | 0.9  | 0.78         | 0.8  | 1.6  | 1.6                | 0.8  | 1.5  | 1.04                 | 0.35 | 1.5  |
| CD73           | 98.3 | 100  | 100  | 99.8 | 100  | 100  | 98.5         | 100  | 100  | 97.8               | 100  | 100  | 99.2                 | 99.8 | 99.9 |
| CD74           | 0.23 | 0.4  | 0.5  | 0.43 | 1.5  | 1.1  | 1.71         | 2.7  | 1.9  | 73.2               | 67   | 8.5  | 37.3                 | 47.9 | 16.3 |
| CD75           | 0.13 | 0.4  | 0.4  | 0.7  | 2    | 0.8  | 0.58         | 0.5  | 1.6  | 1.76               | 0.7  | 1.5  | 0.47                 | 0.45 | 1.7  |
| CD77           | 0.1  | 0.6  | 0.9  | 1.07 | 3.2  | 1.4  | 4.96         | 5.9  | 5.2  | 2.34               | 1.9  | 3.4  | 1.29                 | 1.93 | 3.6  |
| CD79b          | 0.03 | 0.6  | 0.9  | 1.17 | 1.9  | 1.3  | 1.78         | 1.4  | 2.6  | 0.29               | 1    | 3    | 0.68                 | 0.67 | 3.5  |
| CD80           | 0.16 | 0.3  | 0.4  | 0.28 | 1.1  | 0.6  | 0.25         | 2.7  | 3.2  | 4.17               | 5    | 3.4  | 0.72                 | 2.95 | 3.1  |
| CD81           | 98.3 | 99.9 | 99.9 | 99.9 | 99.9 | 99.9 | 98.6         | 99.8 | 99.7 | 100                | 99.9 | 99.9 | 98.3                 | 99.5 | 99.8 |
| CD83           | 1.88 | 0.6  | 0.8  | 1.07 | 0.9  | 0.9  | 1.39         | 0.7  | 1.8  | 1.62               | 0.9  | 1.4  | 1.77                 | 0.32 | 2.1  |
| CD84           | 0.13 | 0.3  | 0.2  | 0.27 | 0.8  | 0.8  | 0.12         | 0.5  | 1.4  | 0.14               | 0.5  | 1.2  | 0.12                 | 0.39 | 1.1  |
| CD85           | 0.23 | 0.2  | 41.8 | 0.28 | 1    | 0.6  | 0.09         | 0.7  | 1.3  | 0.27               | 0.9  | 1.5  | 0.13                 | 0.16 | 1.3  |
| CD86           | 0.26 | 0.3  | 0.5  | 0.29 | 1.8  | 1.2  | 0.07         | 0.4  | 0.7  | 0.17               | 0.4  | 1.2  | 0.05                 | 0.18 | 0.6  |
| CD87           | 0.13 | 0.2  | 0.4  | 0.36 | 2.6  | 3.2  | 0.09         | 0.4  | 2.6  | 1.99               | 10.8 | 9.5  | 0.08                 | 1.44 | 8.3  |
| CD88           | 0.15 | 0.4  | 0.2  | 0.18 | 1.2  | 1.7  | 15.8         | 0.2  | 1.6  | 0.3                | 5.7  | 5.8  | 0.08                 | 0.73 | 5.1  |
| CD89           | 0    | 0.2  | 0.2  | 0.23 | 1    | 1.1  | 0.15         | 0.2  | 0.9  | 0.12               | 0.5  | 2.4  | 0.07                 | 0.24 | 1.2  |
| CD90           | 99.6 | 99.8 | 100  | 99.6 | 99.9 | 100  | 98.3         | 99.9 | 99.9 | 96.6               | 99.3 | 99.9 | 98.6                 | 96.5 | 99.8 |
| CD91           | 80.4 | 99.5 | 99.2 | 63.1 | 98.7 | 84.5 | 57.9         | 94.2 | 91.2 | 95.8               | 96.3 | 90.7 | 64.3                 | 90.6 | 95.8 |

| Marker | PS2  |      |      | PL   |      |      | Selected FBS |      |      | Selected FBS +FGF2 |      |      | Unselected FBS +FGF2 |      |      |
|--------|------|------|------|------|------|------|--------------|------|------|--------------------|------|------|----------------------|------|------|
|        | D191 | D197 | D199 | D191 | D197 | D199 | D191         | D197 | D199 | D191               | D197 | D199 | D191                 | D197 | D199 |
| CDW93  | 0.86 | 1    | 0.6  | 0.94 | 1.7  | 1.1  | 0.7          | 0.3  | 1.1  | 6.21               | 0.4  | 1.5  | 1.18                 | 0.28 | 0.8  |
| CD94   | 0    | 0.3  | 0.4  | 0.25 | 1    | 1.1  | 0.12         | 0.3  | 0.7  | 0.33               | 0.4  | 0.9  | 0.1                  | 0.25 | 1    |
| CD95   | 98.2 | 99.9 | 100  | 99   | 100  | 100  | 96.5         | 100  | 99.9 | 98.3               | 100  | 100  | 99.5                 | 99.8 | 99.8 |
| CD97   | 99.8 | 95.4 | 90.8 | 88.6 | 97.6 | 91.8 | 94.2         | 99.9 | 98.2 | 92.9               | 98.8 | 96   | 63.4                 | 97.3 | 90.9 |
| CD98   | 99.8 | 99.9 | 100  | 99.6 | 100  | 100  | 99.7         | 99.9 | 99.9 | 99.7               | 99.9 | 100  | 98.2                 | 99.7 | 99.8 |
| CD99   | 99.5 | 100  | 99.9 | 99.9 | 100  | 100  | 100          | 99.9 | 100  | 100                | 100  | 99.9 | 100                  | 99.9 | 99.8 |
| CD99R  | 99.3 | 76.6 | 98.6 | 83.7 | 92.9 | 69.3 | 94.4         | 98.8 | 86.6 | 99.3               | 92.9 | 95.5 | 98.3                 | 73.8 | 75.9 |
| CD100  | 0.43 | 0.3  | 0.3  | 1.2  | 0.6  | 1.2  | 0.4          | 0.2  | 0.3  | 2.36               | 0.1  | 1.4  | 0.97                 | 0.22 | 0.4  |
| CD102  | 19.5 | 15.4 | 7.2  | 7.38 | 33.3 | 13.5 | 32           | 73.6 | 43.1 | 49.3               | 69.5 | 31.8 | 29.7                 | 66.5 | 26.5 |
| CD103  | 0.33 | 0.3  | 0.4  | 0.29 | 1.3  | 1    | 0.34         | 0.3  | 1.1  | 1.38               | 0.3  | 1.5  | 0.42                 | 0.22 | 0.8  |
| CD105  | 99.4 | 100  | 99.9 | 99.6 | 99.9 | 100  | 99.2         | 99.9 | 99.9 | 98.5               | 99.8 | 100  | 99.2                 | 99.8 | 100  |
| CD106  | 3.08 | 13.5 | 6.9  | 6.24 | 67.3 | 29.7 | 68.8         | 96.4 | 80.1 | 82.2               | 94.2 | 85.3 | 90                   | 85.6 | 67.1 |
| CD107a | 70   | 91.7 | 88.7 | 49.1 | 83.8 | 74.9 | 23.7         | 94.2 | 84.5 | 56.8               | 90.6 | 75.9 | 29.4                 | 57.4 | 76.7 |
| CD107b | 23.6 | 35.1 | 32.7 | 8.59 | 32   | 24.4 | 10.8         | 68.2 | 36.7 | 21.6               | 41.2 | 28.2 | 3.39                 | 8.16 | 30.6 |
| CD108  | 99.5 | 99.9 | 99.9 | 98.2 | 99.9 | 100  | 83.8         | 100  | 96.4 | 92.4               | 99.9 | 99.1 | 76.9                 | 99   | 97.2 |
| CD109  | 19.6 | 69.5 | 82   | 4.22 | 96.5 | 97.3 | 23           | 99.1 | 91.3 | 95.8               | 99.1 | 98   | 93.8                 | 97.2 | 86.9 |
| CD112  | 2.98 | 6.1  | 10.7 | 0.63 | 2.4  | 1.7  | 0.3          | 5.1  | 1.9  | 1.96               | 2.2  | 3    | 1.24                 | 0.29 | 1.1  |
| CD114  | 0.1  | 0.3  | 0.5  | 0.3  | 1.5  | 0.9  | 0.02         | 0.2  | 0.7  | 0.19               | 0.3  | 1.2  | 0.07                 | 0.26 | 0.9  |
| CD116  | 56.5 | 0.5  | 0.6  | 0.66 | 2    | 1.4  | 69.7         | 0.4  | 1.3  | 40.8               | 0.3  | 1.7  | 11.5                 | 0.47 | 1.5  |
| CD117  | 0.53 | 0.4  | 0.3  | 0.32 | 1.7  | 1.1  | 41.2         | 0.2  | 0.8  | 1.25               | 0.3  | 1.1  | 0.08                 | 0.26 | 0.7  |
| CD118  | 0.29 | 0.2  | 0.4  | 0.23 | 1.4  | 1.1  | 0.09         | 0.4  | 1    | 0.15               | 0.3  | 1.3  | 0.13                 | 0.2  | 0.7  |
| CD119  | 30.3 | 72.8 | 76.2 | 2.54 | 74.2 | 50.4 | 3.28         | 91.5 | 75.7 | 43.6               | 90.2 | 87.2 | 12                   | 45.4 | 48.2 |
| CD120a | 0.86 | 2.8  | 1.1  | 0.78 | 38.4 | 4    | 0.07         | 21.9 | 2.5  | 4.29               | 15.5 | 12   | 0.32                 | 5.56 | 8.2  |
| CD121a | 3.73 | 6    | 2.2  | 0.79 | 38.5 | 10.2 | 0.58         | 40.6 | 11.6 | 24.1               | 17.1 | 31.9 | 11.9                 | 16.8 | 11.2 |
| CD121b | 0.1  | 0.1  | 0.4  | 0.42 | 1    | 1    | 0.07         | 0.1  | 0.7  | 1.3                | 0.2  | 1.1  | 0.22                 | 0.23 | 0.8  |
| CD122  | 0.1  | 0.3  | 0.2  | 0.33 | 1.3  | 1    | 0.07         | 0.3  | 0.9  | 0.22               | 0.2  | 1.2  | 5.64                 | 0.29 | 0.9  |

| Marker | PS2  |      |      | PL   |      |      | Selected FBS |      |      | Selected FBS +FGF2 |      |      | Unselected FBS +FGF2 |      |      |
|--------|------|------|------|------|------|------|--------------|------|------|--------------------|------|------|----------------------|------|------|
|        | D191 | D197 | D199 | D191 | D197 | D199 | D191         | D197 | D199 | D191               | D197 | D199 | D191                 | D197 | D199 |
| CD123  | 0.07 | 0.2  | 0.4  | 0.3  | 1.3  | 1.2  | 0.08         | 2.8  | 2.4  | 4.29               | 4.2  | 4.1  | 1.36                 | 4.2  | 1.8  |
| CD124  | 0.08 | 0.5  | 0.1  | 0.2  | 1.3  | 1    | 0.02         | 3.3  | 1.2  | 0.32               | 0.9  | 1.7  | 0.19                 | 0.26 | 1.5  |
| CD126  | 0.03 | 0.2  | 0.2  | 0.16 | 1.1  | 1.1  | 0.03         | 0.1  | 1    | 0.12               | 0.2  | 0.7  | 0.05                 | 0.18 | 0.6  |
| CD127  | 0.17 | 0.3  | 0.3  | 0.25 | 2.7  | 1.1  | 0.03         | 0.5  | 1.4  | 0.32               | 0.7  | 1.5  | 0.08                 | 0.26 | 0.7  |
| CD128b | 0.2  | 2.1  | 0.5  | 0.31 | 0.5  | 0.8  | 93.8         | 0.2  | 0.4  | 0.15               | 0.2  | 4.4  | 0.96                 | 0.31 | 1.6  |
| CD130  | 56   | 77   | 71.6 | 6.18 | 83.5 | 49.1 | 97.7         | 87.9 | 78.8 | 75.1               | 93.2 | 96.5 | 30                   | 65.9 | 76.3 |
| CD134  | 0.92 | 0.8  | 1.1  | 0.27 | 1.4  | 1.2  | 0.56         | 0.4  | 1.3  | 0.32               | 0.2  | 1.2  | 0.4                  | 0.16 | 1.1  |
| CD135  | 0.19 | 0.3  | 0.3  | 0.2  | 1.7  | 0.9  | 71.7         | 0.2  | 0.9  | 0.44               | 0.1  | 1.6  | 0.08                 | 0.29 | 0.7  |
| CD137  | 0.08 | 0.3  | 0.4  | 0.25 | 2.2  | 0.9  | 0.08         | 0.4  | 0.9  | 0.17               | 0.3  | 1.7  | 0.1                  | 0.2  | 0.6  |
| CD137L | 0.14 | 0.4  | 0.3  | 0.34 | 1.5  | 1.3  | 0.03         | 0.2  | 1.7  | 0.25               | 0.4  | 1.7  | 0.13                 | 0.3  | 1    |
| CD138  | 0.21 | 0.3  | 0.2  | 0.32 | 15.8 | 2.7  | 0.08         | 0.4  | 1.1  | 0.2                | 0.4  | 1.7  | 0.07                 | 0.28 | 0.5  |
| CD140a | 88.9 | 54.4 | 24.3 | 0.33 | 19.3 | 3    | 80.2         | 99.3 | 97.1 | 97.7               | 99.9 | 99.2 | 96                   | 98.9 | 96.3 |
| CD140b | 99.9 | 99.9 | 100  | 98.6 | 99.4 | 99.9 | 99.6         | 100  | 99.9 | 99.5               | 100  | 100  | 99.4                 | 99.8 | 99.2 |
| CD141  | 19.6 | 9.4  | 7.5  | 1.25 | 6    | 2.7  | 2.58         | 15.4 | 21.1 | 95                 | 67.3 | 78   | 72.7                 | 73.7 | 79   |
| CD142  | 97.5 | 94.8 | 94.1 | 0.47 | 1.5  | 6.1  | 1.51         | 3    | 16.9 | 3.4                | 3.3  | 38.9 | 3.21                 | 2.07 | 28.8 |
| CD144  | 0.1  | 0.3  | 0.6  | 0.27 | 2    | 0.9  | 0.03         | 0.6  | 1.4  | 0.39               | 0.4  | 2.3  | 0.2                  | 0.16 | 1.7  |
| CD146  | 92   | 92.9 | 95.4 | 98.7 | 99.1 | 99.7 | 98.6         | 96.8 | 96.1 | 72.8               | 65.7 | 90.6 | 34.6                 | 44.9 | 73.2 |
| CD147  | 99.9 | 99.8 | 100  | 99.9 | 99.9 | 100  | 99.9         | 99.9 | 99.9 | 99.8               | 99.8 | 100  | 99.5                 | 99.7 | 100  |
| CD150  | 1.38 | 0.3  | 0.3  | 0.36 | 1.6  | 0.8  | 5.01         | 0.3  | 1.1  | 1.78               | 0.3  | 1.7  | 0.77                 | 0.41 | 0.9  |
| CD151  | 98.9 | 100  | 99.9 | 97.8 | 99.9 | 100  | 98.4         | 100  | 99.9 | 99.1               | 99.9 | 100  | 98.8                 | 99.6 | 99.9 |
| CD152  | 1.38 | 0.4  | 0.6  | 1.4  | 0.9  | 1.2  | 0.78         | 0.2  | 1.1  | 2.08               | 0.3  | 1.9  | 1.39                 | 0.2  | 1.1  |
| CD153  | 0.25 | 0.5  | 1.1  | 0.72 | 1    | 0.9  | 0.67         | 0.2  | 1.1  | 0.37               | 0.5  | 1.4  | 0.35                 | 0.33 | 1.6  |
| CD154  | 0.14 | 0.5  | 0.4  | 0.25 | 0.8  | 1.2  | 0.03         | 0.2  | 0.7  | 0.15               | 0.4  | 1.5  | 0.17                 | 0.2  | 0.6  |
| CD158a | 0.07 | 0.2  | 0.3  | 0.35 | 0.7  | 1    | 0.05         | 0.3  | 0.7  | 0.13               | 0.2  | 1.5  | 0.1                  | 0.28 | 0.8  |
| CD158b | 0.17 | 0.4  | 0.3  | 0.2  | 0.9  | 1.2  | 0.1          | 0.2  | 0.8  | 0.19               | 0.4  | 1.2  | 0.05                 | 0.24 | 0.7  |
| CD161  | 0.4  | 0.2  | 0.1  | 0.27 | 0.9  | 0.8  | 0.03         | 0.1  | 0.9  | 0.1                | 0.2  | 1.1  | 0.08                 | 0.16 | 0.6  |

| Marker | PS2  |      |      | PL   |      |      | Selected FBS |      |      | Selected FBS +FGF2 |      |      | Unselected FBS +FGF2 |      |      |
|--------|------|------|------|------|------|------|--------------|------|------|--------------------|------|------|----------------------|------|------|
|        | D191 | D197 | D199 | D191 | D197 | D199 | D191         | D197 | D199 | D191               | D197 | D199 | D191                 | D197 | D199 |
| CD162  | 1.66 | 11.2 | 2.3  | 0.75 | 58.5 | 26.3 | 1.41         | 27.9 | 13.2 | 0.29               | 17.9 | 36.5 | 0.27                 | 7.85 | 14.8 |
| CD163  | 0.07 | 0.4  | 0.7  | 0.34 | 1.6  | 1    | 0            | 0.6  | 1.1  | 0.2                | 0.3  | 2    | 0.12                 | 0.22 | 0.6  |
| CD164  | 99.9 | 100  | 99.9 | 98.6 | 99.9 | 99.8 | 99.5         | 99.9 | 100  | 98.4               | 100  | 100  | 99.7                 | 99.7 | 100  |
| CD165  | 100  | 99.9 | 99.6 | 92.2 | 99.9 | 99.5 | 94.2         | 99.8 | 99.3 | 97.1               | 99.8 | 99.9 | 95.9                 | 97.6 | 97.9 |
| CD166  | 99.9 | 100  | 100  | 99.7 | 100  | 100  | 99.5         | 99.9 | 100  | 99.9               | 100  | 100  | 99.5                 | 99.7 | 99.9 |
| CD171  | 0.17 | 0.4  | 0.4  | 0.51 | 1.4  | 1.4  | 1.19         | 0.4  | 1.7  | 1.66               | 0.4  | 1.8  | 1.21                 | 0.28 | 0.8  |
| CD172b | 0.11 | 0.2  | 0.1  | 0.13 | 0.9  | 0.8  | 0.03         | 0.3  | 0.8  | 0.22               | 0.3  | 1.7  | 0.12                 | 0.22 | 0.8  |
| CD177  | 0.07 | 0.1  | 0.5  | 0.24 | 0.9  | 0.9  | 0.07         | 0.2  | 1.1  | 0.2                | 0.3  | 1.5  | 0.07                 | 0.16 | 0.8  |
| CD178  | 0.2  | 0.2  | 0.1  | 0.16 | 1.1  | 1    | 0.07         | 0.2  | 1    | 0.15               | 0.2  | 1.3  | 0.07                 | 0.14 | 0.7  |
| CD180  | 0.1  | 0.5  | 0.4  | 0.87 | 0.6  | 1.3  | 0.6          | 0.5  | 1.1  | 0.74               | 0.3  | 1.9  | 0.2                  | 0.27 | 0.8  |
| CD181  | 99.4 | 81.6 | 59.4 | 15.7 | 91.3 | 43.2 | 17.2         | 76.4 | 59.2 | 47.4               | 68.7 | 76.5 | 48.1                 | 60.5 | 72.3 |
| CD183  | 8.55 | 0.9  | 0.4  | 0.87 | 1    | 1.4  | 0.74         | 0.5  | 1.9  | 0.89               | 0.5  | 1.8  | 0.98                 | 0.61 | 1.8  |
| CD184  | 0.1  | 0.4  | 0.9  | 0.31 | 0.7  | 1.3  | 0.1          | 0.5  | 1.3  | 0.22               | 0.2  | 1.5  | 0.1                  | 0.26 | 0.9  |
| CD193  | 0.07 | 0.7  | 1.6  | 0.67 | 1.9  | 1.7  | 0.29         | 0.4  | 2.3  | 0.19               | 0.5  | 3.3  | 0.24                 | 0.47 | 2.7  |
| CD195  | 0.23 | 0.3  | 0.7  | 0.98 | 1.3  | 1.3  | 0.62         | 0.4  | 1.4  | 0.31               | 0.5  | 2.5  | 0.17                 | 0.53 | 1.8  |
| CD196  | 0.5  | 0.8  | 1.9  | 0.53 | 1.6  | 1.3  | 0.19         | 0.5  | 2    | 0.31               | 0.6  | 2.5  | 0.28                 | 0.7  | 2.1  |
| CD197  | 0.2  | 0.4  | 0.9  | 0.87 | 1    | 1.1  | 0.76         | 0.4  | 1.1  | 0.87               | 0.6  | 1.9  | 1.49                 | 0.37 | 1.4  |
| CD200  | 6.16 | 20   | 23.3 | 1    | 3.4  | 6.1  | 9.48         | 10.8 | 34.6 | 37                 | 52.9 | 80.6 | 46.9                 | 28.9 | 70.4 |
| CD205  | 1.55 | 1.3  | 1.4  | 0.47 | 2.1  | 3    | 4.15         | 5.3  | 8.2  | 52.9               | 20.4 | 33.7 | 53                   | 12.8 | 17.6 |
| CD206  | 0.08 | 0.7  | 0.2  | 0.25 | 1.1  | 1.1  | 0.1          | 0.4  | 0.9  | 1.24               | 0.2  | 1.7  | 0.03                 | 0.27 | 0.4  |
| CD209  | 1.16 | 0.4  | 1.2  | 1.7  | 1.2  | 1.4  | 1.84         | 0.6  | 1.7  | 0.54               | 0.5  | 2.3  | 0.74                 | 0.61 | 2.3  |
| CD220  | 0.1  | 0.8  | 0.4  | 0.88 | 18.7 | 13   | 0.15         | 48.9 | 13.8 | 3.78               | 16.3 | 29.3 | 1.11                 | 1.24 | 8.9  |
| CD221  | 99.8 | 89.2 | 88.6 | 25.4 | 80.6 | 62.1 | 5.87         | 96.4 | 79.5 | 32.8               | 69.2 | 88.6 | 12.3                 | 19.5 | 47.5 |
| CD226  | 1.09 | 0.4  | 0.6  | 0.23 | 0.8  | 1.3  | 0.19         | 0.4  | 1.3  | 0.5                | 0.2  | 1.2  | 0.17                 | 0.31 | 1.1  |
| CD227  | 32.9 | 32.1 | 37   | 54.2 | 69.8 | 70.8 | 69.9         | 80.2 | 81.1 | 75.5               | 90.6 | 91.8 | 84.8                 | 78.4 | 66.6 |
| CD229  | 0.75 | 0.4  | 0.4  | 0.44 | 1.4  | 0.8  | 0.26         | 0.5  | 1.2  | 1.55               | 0.6  | 2.5  | 0.66                 | 0.33 | 1    |

| Marker | PS2  |      |      | PL   |      |      | Selected FBS |      |      | Selected FBS +FGF2 |      |      | Unselected FBS +FGF2 |      |      |
|--------|------|------|------|------|------|------|--------------|------|------|--------------------|------|------|----------------------|------|------|
|        | D191 | D197 | D199 | D191 | D197 | D199 | D191         | D197 | D199 | D191               | D197 | D199 | D191                 | D197 | D199 |
| CD231  | 0.23 | 0.5  | 0.6  | 0.38 | 1.7  | 1.3  | 0.04         | 0.4  | 1    | 0.26               | 0.9  | 2.6  | 0.12                 | 0.47 | 1    |
| CD235a | 0.1  | 25.3 | 4.3  | 0.44 | 8.2  | 6.5  | 0.24         | 0.7  | 1.7  | 0.45               | 1.3  | 2.8  | 0.12                 | 0.82 | 2.4  |
| CD243  | 0.32 | 0.6  | 0.8  | 0.93 | 2.1  | 1.7  | 0.86         | 0.8  | 2.3  | 0.66               | 1.1  | 2.7  | 0.44                 | 0.76 | 2.8  |
| CD244  | 0.32 | 0.4  | 0.3  | 0.27 | 1.6  | 0.7  | 0.05         | 0.4  | 1.1  | 0.09               | 0.2  | 1.8  | 0.07                 | 0.21 | 0.8  |
| CD255  | 0.13 | 0.3  | 0.4  | 0.33 | 1.4  | 1.1  | 0.07         | 0.6  | 1    | 0.26               | 0.5  | 1.7  | 0.12                 | 0.27 | 1    |
| CD268  | 0.25 | 0.2  | 0.4  | 0.36 | 1.2  | 0.8  | 0.07         | 0.1  | 1    | 0.28               | 0.5  | 2    | 0.05                 | 0.21 | 0.7  |
| CD271  | 0.79 | 18.4 | 11.6 | 0.91 | 18.5 | 3.4  | 0.53         | 2.9  | 2.2  | 1.31               | 6.3  | 2.7  | 0.36                 | 1.09 | 1.4  |
| CD273  | 97.3 | 99.3 | 99.6 | 94.7 | 99.7 | 99.9 | 53.9         | 98.6 | 98.3 | 45.7               | 94.5 | 98.8 | 24.6                 | 69.1 | 87.9 |
| CD274  | 99.5 | 99.9 | 100  | 87.6 | 100  | 99.9 | 5.01         | 84.9 | 86.5 | 16.8               | 84.6 | 97.1 | 1.73                 | 38.3 | 78.5 |
| CD275  | 0.89 | 0.5  | 1.1  | 1.02 | 1.1  | 1.2  | 0.99         | 0.6  | 1.8  | 0.95               | 0.7  | 1.9  | 0.55                 | 1.11 | 2    |
| CD278  | 54.9 | 0.3  | 0.5  | 0.33 | 0.7  | 0.8  | 0.02         | 0.3  | 0.6  | 0.09               | 0.3  | 1.1  | 0.14                 | 0.22 | 0.7  |
| CD279  | 0    | 0.6  | 0.3  | 0.22 | 0.9  | 1    | 0.03         | 0.1  | 1.4  | 0.16               | 0.4  | 1.2  | 0.16                 | 0.24 | 0.4  |
| CD282  | 1.49 | 0.4  | 0.1  | 0.26 | 0.6  | 1    | 0.05         | 0.1  | 1.7  | 0.16               | 0.2  | 0.9  | 0.14                 | 0.23 | 0.4  |
| CD305  | 0.5  | 0.6  | 0.4  | 0.29 | 0.8  | 1.3  | 0.05         | 0.2  | 1.5  | 0.18               | 0.2  | 1.3  | 0.1                  | 0.29 | 0.6  |
| CD309  | 0.2  | 0.3  | 0    | 0.24 | 0.8  | 0.9  | 0.05         | 0.2  | 1.1  | 0.19               | 0.2  | 1.3  | 0.1                  | 0.25 | 0.5  |
| CD314  | 0.05 | 0.4  | 0.3  | 0.25 | 0.9  | 0.9  | 0.04         | 0.1  | 0.9  | 0.16               | 0.2  | 1.3  | 0.14                 | 0.16 | 0.7  |
| CD321  | 0.27 | 0.6  | 1    | 1.28 | 2    | 4.1  | 0.3          | 2.4  | 2.4  | 2.08               | 2.6  | 4.4  | 2.25                 | 1.17 | 1.7  |
| CD327  | 0.17 | 0.3  | 0    | 0.33 | 0.7  | 0.9  | 0.05         | 0.2  | 0.6  | 0.1                | 0.1  | 1.4  | 0.07                 | 0.35 | 0.4  |
| CD328  | 0.03 | 0.3  | 0.4  | 0.16 | 0.6  | 1    | 0.09         | 0.2  | 0.5  | 0.16               | 0.3  | 1.1  | 0.05                 | 0.35 | 0.5  |
| CD329  | 0.11 | 0.6  | 0.2  | 0.27 | 0.8  | 0.6  | 0.12         | 0.2  | 0.6  | 0.31               | 0.3  | 1.6  | 0.15                 | 0.2  | 1    |
| CD335  | 0    | 0.3  | 0.2  | 0.21 | 0.6  | 0.4  | 0            | 0.1  | 0.7  | 0.17               | 0.2  | 1.3  | 0.09                 | 0.33 | 0.3  |
| CD336  | 0.06 | 0.2  | 0.1  | 0.26 | 0.5  | 0.6  | 0.11         | 0.1  | 0.3  | 0.14               | 0.1  | 1    | 0.17                 | 0.27 | 0.3  |
| CD337  | 0.14 | 1.4  | 0.1  | 0.53 | 1.2  | 1.1  | 0.47         | 0.3  | 1.4  | 0.44               | 0.3  | 1.9  | 0.5                  | 0.41 | 1.3  |
| CD338  | 0.1  | 0.7  | 0    | 84.8 | 2.1  | 1.9  | 0.23         | 2.3  | 4.3  | 39.2               | 5.3  | 26.2 | 3.19                 | 4.94 | 12.5 |
| CD340  | 98   | 99.9 | 99.6 | 70.8 | 98.3 | 99.6 | 76.1         | 99.9 | 99.9 | 97.8               | 99.6 | 100  | 91.1                 | 98.6 | 97.9 |
| αβTCR  | 1.61 | 1.3  | 0.4  | 1.68 | 1.3  | 1.3  | 2.06         | 0.2  | 1.9  | 1.33               | 0.4  | 2    | 1.05                 | 0.47 | 1.5  |



| Marker           | PS2  |      |      | PL   |      |      | Selected FBS |      |      | Selected FBS +FGF2 |      |      | Unselected FBS +FGF2 |      |      |
|------------------|------|------|------|------|------|------|--------------|------|------|--------------------|------|------|----------------------|------|------|
|                  | D191 | D197 | D199 | D191 | D197 | D199 | D191         | D197 | D199 | D191               | D197 | D199 | D191                 | D197 | D199 |
| β2-microglobulin | 97.4 | 100  | 97.6 | 99   | 100  | 100  | 97.9         | 99.9 | 99.9 | 99.1               | 99.8 | 99.9 | 98.9                 | 99.5 | 99.5 |
| BLTR-1           | 0.69 | 0.5  | 0.1  | 1.24 | 1.2  | 0.8  | 0.08         | 0.2  | 1    | 2.18               | 0.2  | 1.3  | 0.98                 | 0.41 | 0.5  |
| CLIP             | 0.07 | 0.3  | 0    | 0.25 | 0.9  | 1    | 0.05         | 0.2  | 1    | 0.5                | 0.3  | 1.8  | 0.1                  | 0.21 | 0.5  |
| CMRF-44          | 0.24 | 0.3  | 0.1  | 0.34 | 1.1  | 0.9  | 0.11         | 0.2  | 0.8  | 0.57               | 0.4  | 1.6  | 0.08                 | 0.29 | 0.6  |
| CMRF-56          | 0.27 | 0.5  | 0.5  | 0.41 | 0.5  | 0.8  | 0.39         | 0.1  | 0.6  | 35.3               | 11.3 | 2.5  | 18.1                 | 12.2 | 4.2  |
| EGFR             | 98.7 | 99.9 | 100  | 28.8 | 97.2 | 95.3 | 78.3         | 99.8 | 98.8 | 99                 | 100  | 100  | 98.7                 | 99.7 | 99.6 |
| fMLP receptor    | 1.02 | 2.9  | 4.4  | 0.64 | 1    | 2.6  | 2.11         | 0.2  | 0.9  | 1.03               | 0.6  | 9.6  | 1.8                  | 0.12 | 0.9  |
| γδTCR            | 0.04 | 0.5  | 0.2  | 0.2  | 0.5  | 0.7  | 0.06         | 0.1  | 0.3  | 0.21               | 0.3  | 1.5  | 0.066                | 0.31 | 0.4  |
| HPC              | 1.86 | 5.4  | 6.2  | 0.89 | 10.4 | 11.5 | 19.5         | 62.1 | 58   | 49.5               | 83.5 | 71.7 | 59                   | 81.3 | 61   |
| HLA-A,B,C        | 99.6 | 99.9 | 99.7 | 99.8 | 99.8 | 99.9 | 99.5         | 99.9 | 99.5 | 99.8               | 99.9 | 99.9 | 99.7                 | 99.7 | 99.8 |
| HLA-A2           | 0.13 | 0.5  | 4.9  | 0.71 | 0.7  | 1.1  | 0.74         | 0.2  | 1.6  | 0.65               | 0.3  | 1.4  | 1.37                 | 0.39 | 0.6  |
| HLA-DQ           | 64.6 | 93   | 89   | 38.6 | 51.9 | 56.1 | 40.9         | 46.1 | 54.6 | 85.7               | 61.2 | 43.7 | 52                   | 57.5 | 57.5 |
| HLA-DR           | 0.68 | 0.3  | 0.1  | 0.42 | 1.3  | 1.2  | 7.71         | 12.9 | 3    | 99.6               | 98.2 | 64.1 | 95.9                 | 98.7 | 64   |
| HLA-DR,DP,DQ     | 0.11 | 0.6  | 0.4  | 0.36 | 0.9  | 1.2  | 5.06         | 4.7  | 1.9  | 98.8               | 95.8 | 50.6 | 93.7                 | 94.8 | 55.6 |
| Invariant NK T   | 0.19 | 0.3  | 0.1  | 0.23 | 1.1  | 0.9  | 0.07         | 0.4  | 1.1  | 1.2                | 25.7 | 15   | 0.3                  | 12.2 | 6.6  |
| GD2              | 2.84 | 28.1 | 2.5  | 21.6 | 64.2 | 67.2 | 36.5         | 87.2 | 45   | 28.4               | 43.1 | 47.9 | 41.9                 | 44.6 | 40.3 |
| MIC A/B          | 99.2 | 63.5 | 99.6 | 99.2 | 4    | 100  | 95.7         | 2.6  | 99.8 | 97.3               | 3.7  | 99.9 | 83.3                 | 0.33 | 99   |
| NKB1             | 0.74 | 0.3  | 0    | 0.87 | 0.5  | 0.8  | 1.87         | 0.1  | 0.6  | 0.75               | 0.2  | 1.8  | 1.06                 | 0.08 | 0.5  |
| SSEA-1           | 98.3 | 86   | 75.7 | 0.22 | 1    | 0.9  | 0.1          | 0.1  | 0.5  | 0.29               | 0.2  | 1.4  | 0.17                 | 0.16 | 0.5  |
| SSEA-4           | 7.22 | 13.4 | 9.5  | 23.5 | 71   | 63.6 | 32           | 73.2 | 53.4 | 89.6               | 60.1 | 93.2 | 62.5                 | 65.3 | 90.7 |
| TRA-1-60         | 0    | 0.4  | 0.1  | 0.2  | 0.8  | 1.1  | 0.95         | 0.1  | 1.6  | 0.69               | 0.3  | 1.6  | 0.09                 | 0.29 | 0.4  |
| TRA-1-81         | 0.21 | 0.4  | 0    | 0.34 | 0.8  | 0.8  | 0.05         | 0.2  | 1.4  | 0.17               | 0.2  | 1.3  | 0.03                 | 0.18 | 0.5  |
| Vβ 23            | 0.01 | 0.7  | 0.1  | 0.4  | 1.1  | 0.9  | 0.17         | 0.2  | 1.2  | 0.22               | 0.4  | 2.2  | 0.15                 | 0.24 | 0.8  |
| Vβ 8             | 12.6 | 1.2  | 0    | 0.25 | 0.9  | 1.1  | 0.14         | 0.4  | 1.5  | 0.26               | 0.5  | 2.2  | 0.14                 | 0.35 | 0.9  |
| CD326            | 0.28 | 0.8  | 0.4  | 0.69 | 1.6  | 1.2  | 1.2          | 2.3  | 1.9  | 0.49               | 0.5  | 2.5  | 0.49                 | 0.76 | 1.9  |

| Marker             | PS2  |      |      | PL   |      |      | Selected FBS |      |      | Selected FBS +FGF2 |      |      | Unselected FBS +FGF2 |      |      |
|--------------------|------|------|------|------|------|------|--------------|------|------|--------------------|------|------|----------------------|------|------|
|                    | D191 | D197 | D199 | D191 | D197 | D199 | D191         | D197 | D199 | D191               | D197 | D199 | D191                 | D197 | D199 |
| CD49f              | 35.2 | 44.6 | 39.9 | 29.5 | 96   | 98.7 | 60           | 38.8 | 71.9 | 82.3               | 54.3 | 72.6 | 49.6                 | 40.3 | 70.7 |
| CD104              | 0.07 | 0.7  | 0.1  | 0.11 | 1.3  | 1.5  | 0.64         | 0.3  | 0.8  | 0.67               | 0.4  | 2.3  | 0.07                 | 0.37 | 0.8  |
| CD120b             | 0.03 | 0.4  | 0    | 0.6  | 1.2  | 1.7  | 0.09         | 0.3  | 0.5  | 2.56               | 0.5  | 4    | 0.17                 | 0.41 | 1.1  |
| CD132              | 3.14 | 0.3  | 0.1  | 1.56 | 1.2  | 1.3  | 0.24         | 0.4  | 0.8  | 0.38               | 0.4  | 1.2  | 0.18                 | 0.35 | 0.7  |
| CD201              | 99.7 | 98.4 | 98.9 | 85.3 | 93.9 | 95.4 | 63.6         | 88.8 | 70.2 | 96.5               | 96.3 | 93.6 | 96.8                 | 94.2 | 92.9 |
| CD210              | 0.43 | 0.4  | 0.1  | 2.15 | 1    | 1.5  | 1.3          | 0.3  | 0.7  | 0.84               | 0.2  | 1.5  | 1.16                 | 0.18 | 0.7  |
| CD212              | 0.07 | 0.3  | 0.2  | 1.51 | 1.1  | 1.4  | 0.13         | 0.4  | 0.9  | 0.46               | 0.1  | 1.5  | 0.1                  | 0.3  | 0.4  |
| CD267              | 0.03 | 0.3  | 0.6  | 1.69 | 0.9  | 1.3  | 0.12         | 0.4  | 1.3  | 0.26               | 0.3  | 1.6  | 0.03                 | 0.28 | 0.5  |
| CD294              | 0.07 | 0.3  | 0.1  | 1.45 | 1    | 1.2  | 0.08         | 0.4  | 0.7  | 0.41               | 0.2  | 1.6  | 0.1                  | 0.18 | 0.3  |
| SSEA-3             | 0.07 | 0.4  | 0.2  | 1.66 | 1    | 1.3  | 0.31         | 0.2  | 0.8  | 3.37               | 0.2  | 1.1  | 1.42                 | 0.2  | 0.3  |
| CLA                | 0.62 | 0.2  | 0    | 1.76 | 0.9  | 1.5  | 0.53         | 0.2  | 0.5  | 0.54               | 0.2  | 1.6  | 0.48                 | 0.16 | 0.4  |
| Integrin $\beta$ 7 | 0.03 | 0.3  | 0.1  | 1.16 | 0.8  | 1    | 0.14         | 0.2  | 0.7  | 0.37               | 0.2  | 1.4  | 0.08                 | 0.28 | 0.4  |
| CD317              | 0.43 | 2.64 | 2.68 | 1.55 | 0.92 | 1.3  | 6.64         | 15.1 | 6.31 | 7.76               | 38.7 | 22.9 | 9.1                  | 50.7 | 13.4 |
